# Supplementary material for: Synthesis of novel carbon nano-chains and their application as supercapacitors
Source: Royal Society of Chemistry journal article supplement (doi:10.1039/c4ta02623c), 2014-08-06
Supplement: c4ta02623c1.pdf [file c4ta02623c1.pdf]

**Supporting Information**  
**for**  
**Synthesis of Novel Carbon Nano-Chains and Their**  
**Application as Supercapacitors**

Miao Zhang,<sup>a</sup> Naiqin Zhao,<sup>a, b</sup> Junwei Sha,<sup>a</sup> Enzuo Liu,<sup>a</sup> Chunsheng Shi,<sup>a</sup>

Jiajun Li<sup>a</sup> and Chunnian He<sup>a, b, \*</sup>

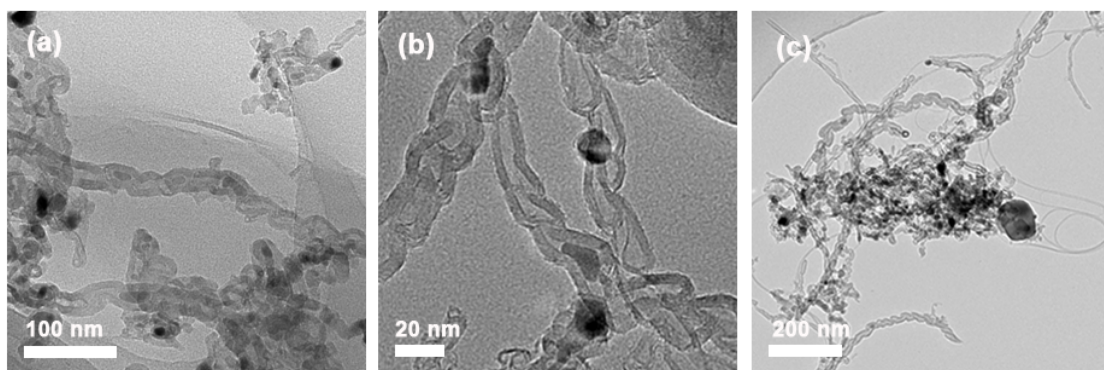

Fig. S1. TEM images of the carbon products grown at 750 °C for different time, when the gas ratio of CH<sub>4</sub> to Ar is 30/500 mL/min, (a) 20 min, (b) 40 min, (c) 60 min.
